# Supplementary material for: Drone Delivery of Dehydro-Sulfurization Utilizing Doubly-Charged Negative Ions of Nanoscale Catalysts Inspired by the Biomimicry of Bee Species’ Bio-Catalysis of Pollen Conversion to Organic Honey
Source: Preprints.org preprint supplement (doi:10.20944/preprints202209.0379.v1), 2022-09-26
Supplement: Supplementary file 1 [file supplementary]

Archive with 2 entries (2 files):
- Reviewer1responsesubmiss (1).pdf
- Reviewer2responsesubmiss (1).pdf
